# Supplementary material
Source: MDPI journal article supplement (https://www.mdpi.com/2673-4605/6/1/13)
Supplement: s1 [file s1]

# **The corrosion behavior of 316L stainless steel additively manufactured by direct energy deposition process**

Tomer Ron\*, Avi Leon, Amnon Shirizly and Eli Aghion

Department of Materials Engineering, Ben-Gurion University of the Negev, Beer-Sheva, Israel

\*Corresponding author: [toron@post.bgu.ac.il](mailto:toron@post.bgu.ac.il)

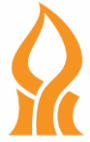

# Additive Manufacturing (3D printing) Technologies

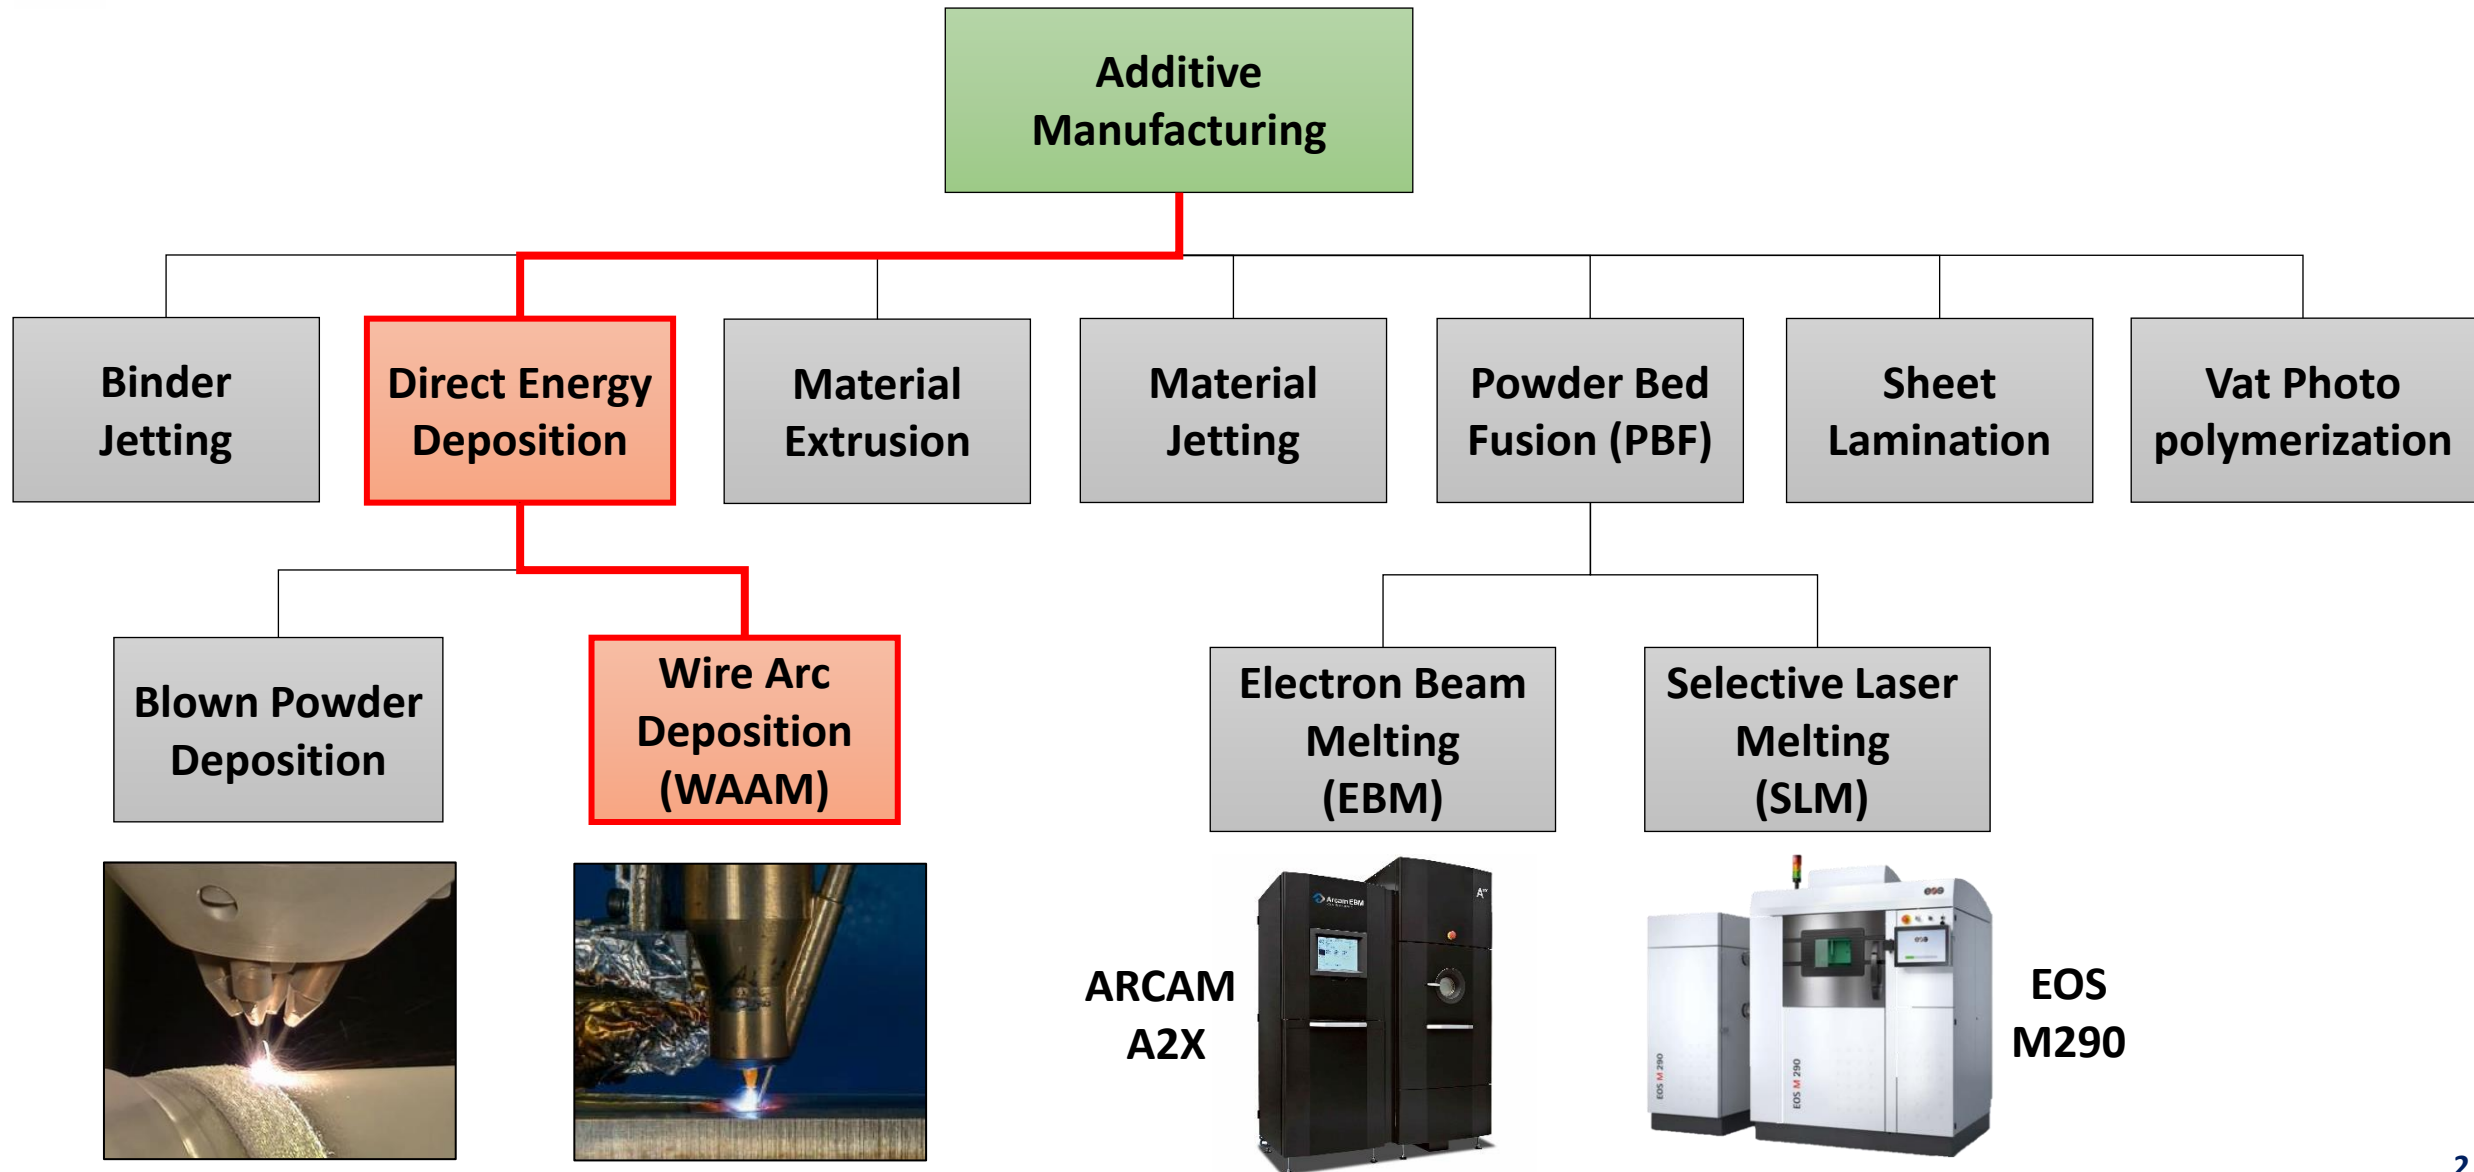

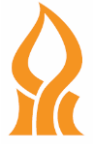

# Relative benefits and limitations of WAAM

|                    | PBT       | WAAM        |
|--------------------|-----------|-------------|
| Cost               | High ✗    | Low ✓       |
| Energy consumption | High ✗    | Low ✓       |
| Deposition rate    | Low ✗     | High ✓      |
| Dimensions         | Limited ✗ | Unlimited ✓ |
| Surface roughness  | Low ✓     | High ✗      |
| Compellability     | High ✓    | Low ✗       |

Numerical example (stainless steel)

| Process parameters        | SLM         | WAAM       |
|---------------------------|-------------|------------|
| Deposition rate (Kg/h)    | 0.4         | 10         |
| Power (KW/Kg)             | 62.9        | 5.18       |
| Raw material (\$/Kg)      | 97          | 15         |
| <b>Total cost (\$/Kg)</b> | <b>1140</b> | <b>160</b> |



# Materials and methods

---

## Microstructure

Optical  
Microscopy

SEM

XRD

## Mechanical properties

Tensile

## Corrosion and stress corrosion performance

Immersion

SSRT

Polarization

Impedance

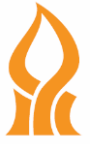

# Wire Arc Deposition - WAAM of ER70S and 316L

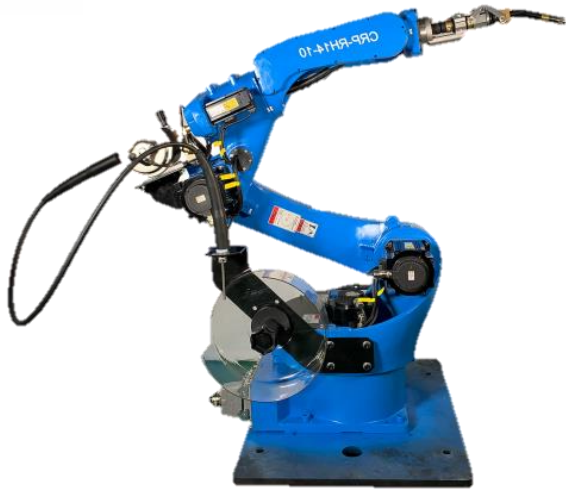

Cloos Rotrol V7.13

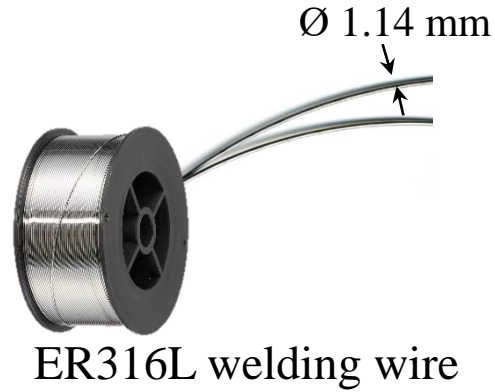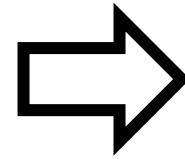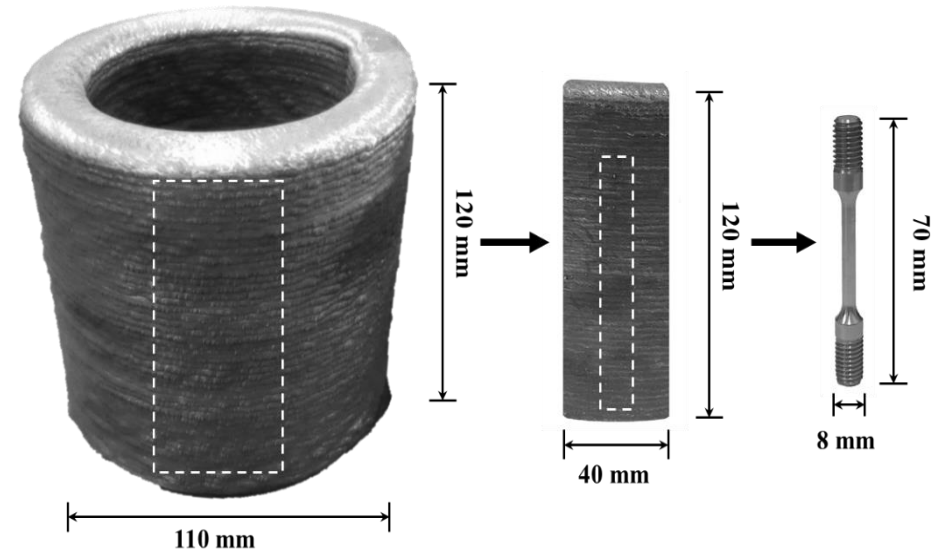

## Deposition parameter:

Layer thickness: 2 mm

Deposition speed: 14 cm/min

Feed rate: 6.1 m/min

Pulse frequency: 120 Hz

Current: 210 A

Voltage: 23.9-24.1 V

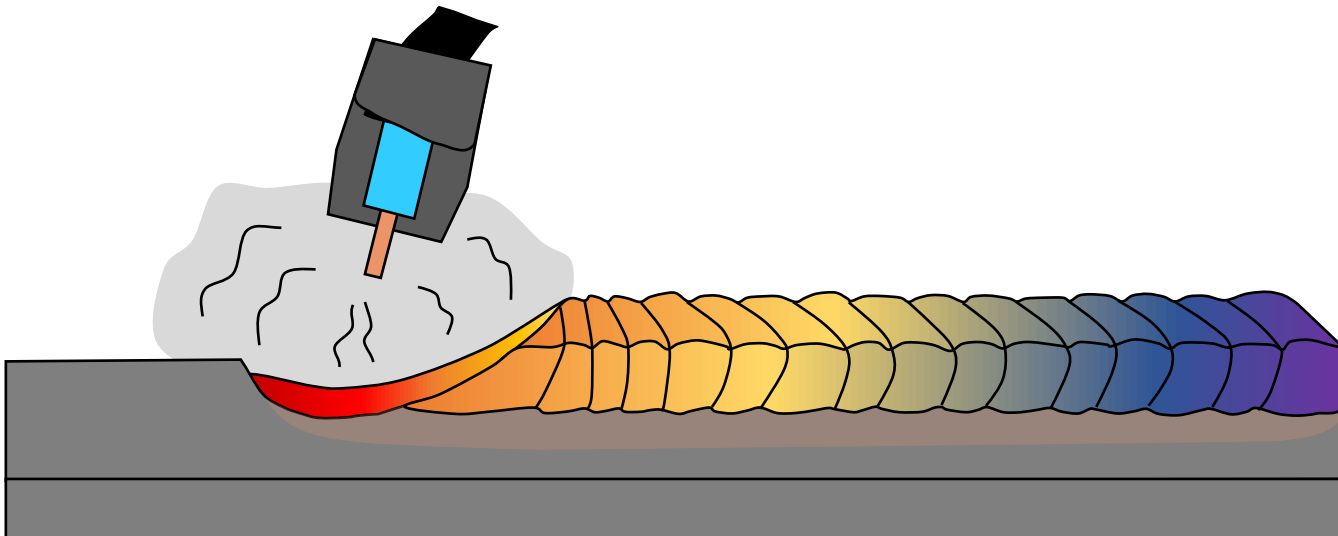



# X-ray diffraction

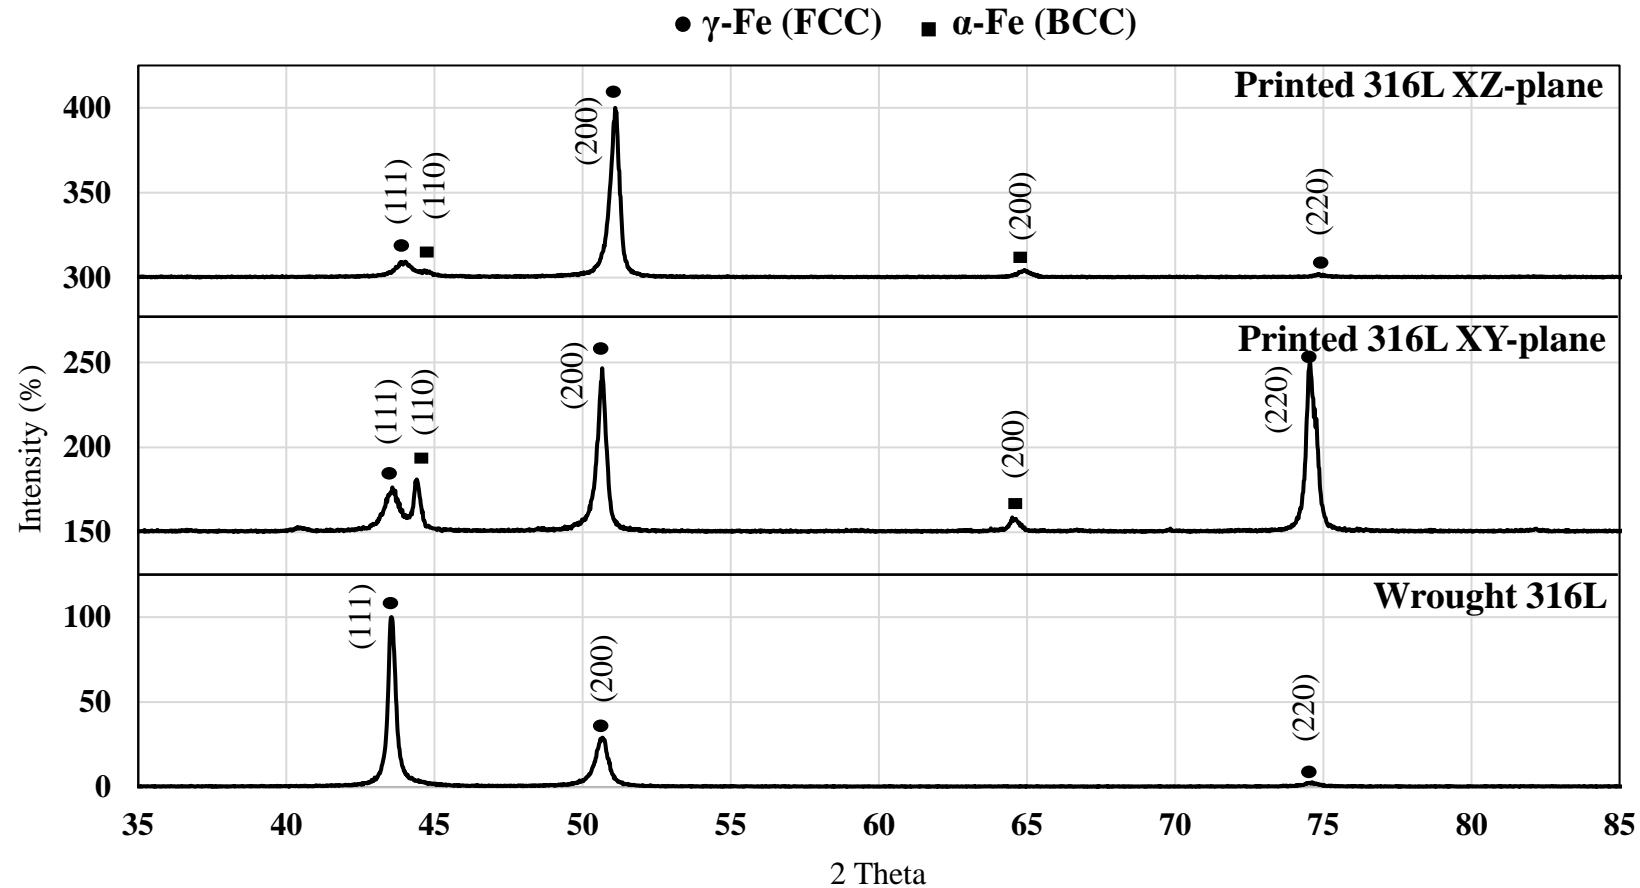

- Wrought alloy: single phase,  $\gamma$ -Fe (FCC).
- Printed alloy:  $\gamma$ -Fe (FCC) matrix and secondary  $\delta$ -Fe (BCC).
- The difference between the peaks intensities of the printed alloy in the XY and XZ planes relates to the epitaxial solidification of the alloy.



# Microstructure of printed 316L obtained by WAAM process

## Printed 316L

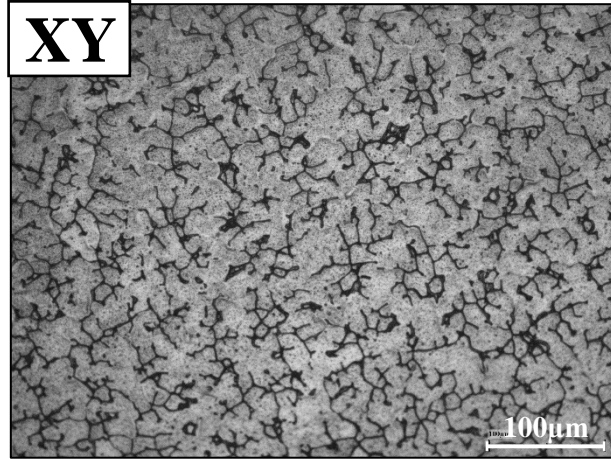

**Fe-0.024%C-19.21%Cr-11.62%Ni**

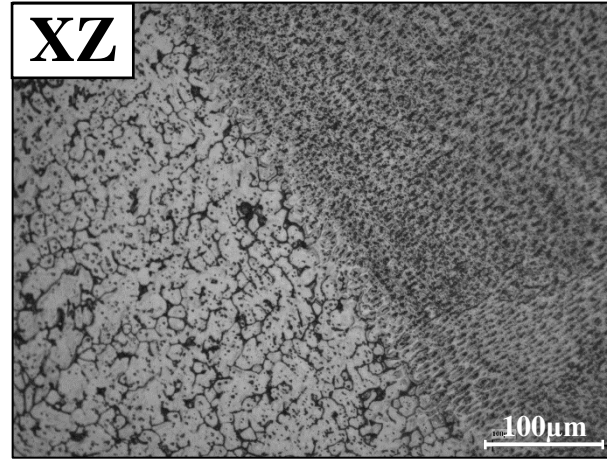

## Wrought 316L

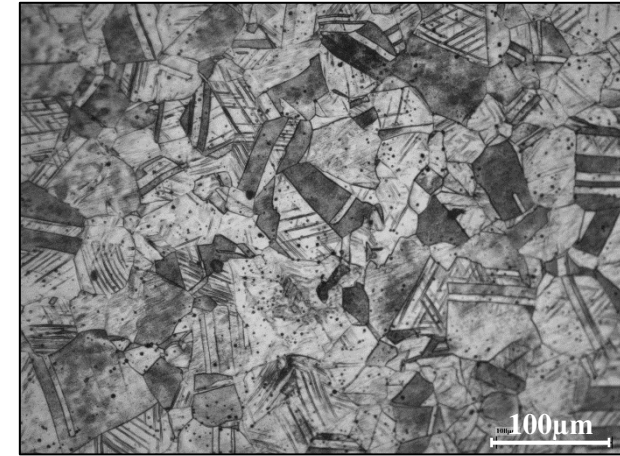

**Fe-0.021%C-16.58%Cr-10.07%Ni**

- The microstructure of the printed 316L was composed of austenitic matrix and secondary ferritic phase. This was in contrast with the wrought alloy that was composed only from austenitic phase.
- There was a difference between the transverse and longitudinal cross-sections of the printed 316L. This was illustrated by the presence of melt pool boundaries in XZ orientation.

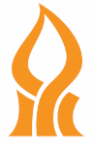

# Close-up view of macro and microstructure of printed 316L

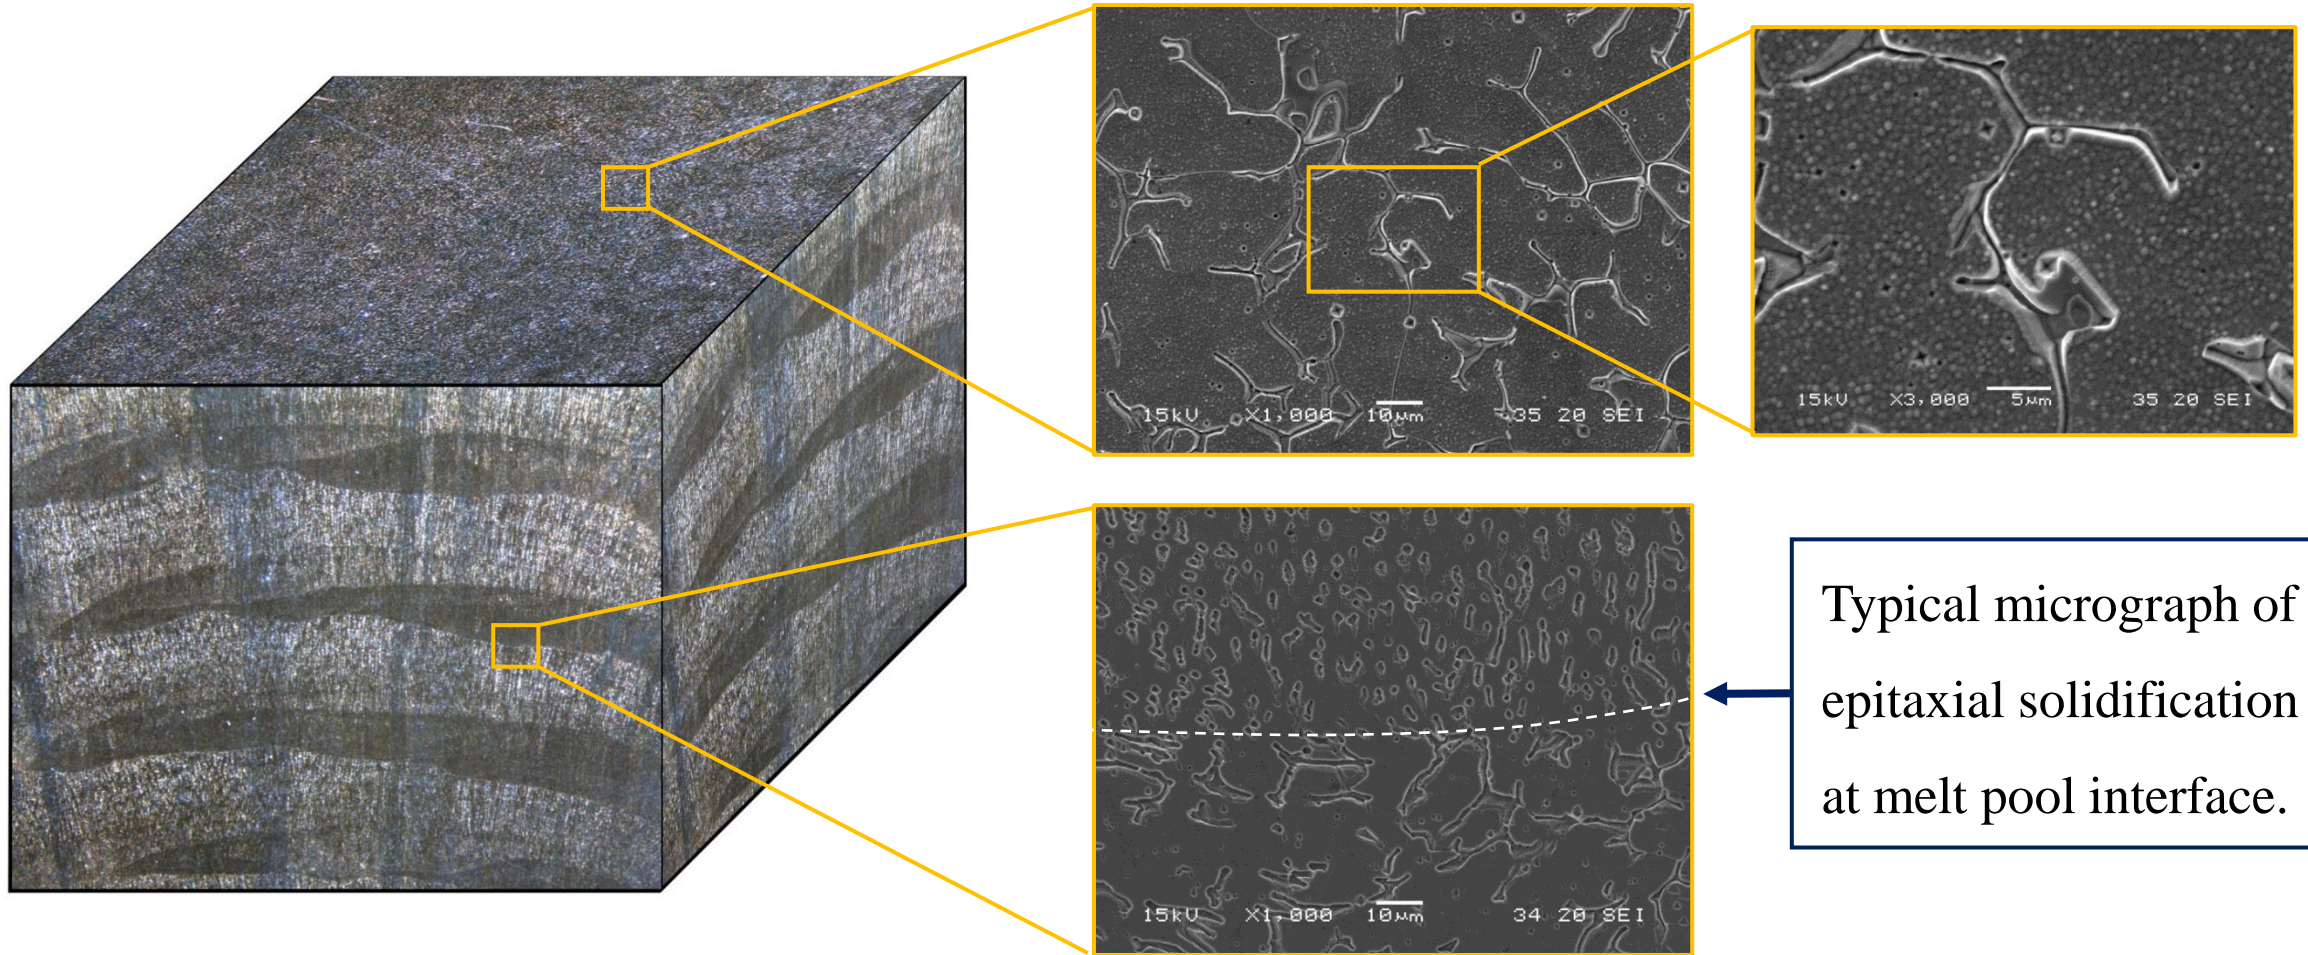





# Mechanical properties

---

| <b>Mechanical properties</b> | <b>Printed 316L</b> | <b>AISI 316L</b> |
|------------------------------|---------------------|------------------|
| Yield Strength (MPa)         | 364±17              | 695±3            |
| Tensile Strength (MPa)       | 552±11              | 752±3            |
| Elongation (%)               | 52±1                | 37±1             |
| Hardness (HV)                | 196±5               | 275±9            |

- The strength and hardness of the printed alloy were relatively reduced compared to the counterpart 316L alloy, while the ductility was comparatively increased.



# Potentiodynamic polarization

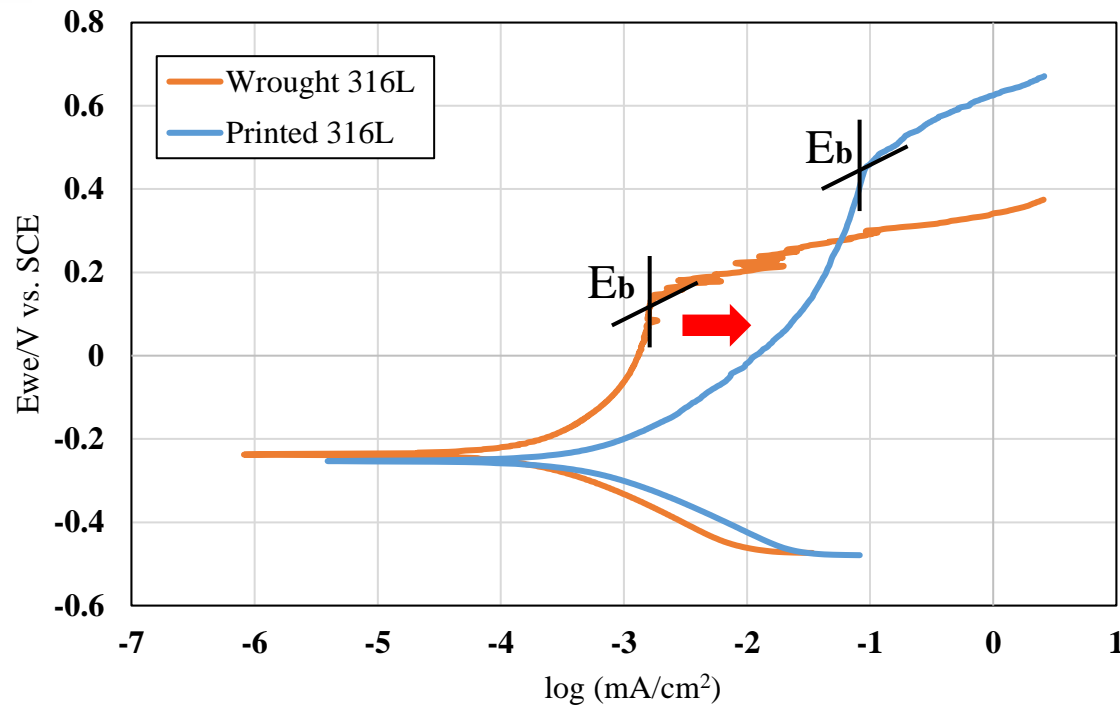

- The passivation transition curves of the two alloys were relatively similar with different break potential and corrosion current.
- Although Tafel extrapolation showed that the corrosion rate of the printed alloy was relatively higher than the wrought alloy, both alloys exhibit outstanding corrosion resistance (<0.02 mm/yr).

|                                     | Printed 316L      | Wrought 316L      |
|-------------------------------------|-------------------|-------------------|
| $E_{\text{Corr}}$ (v)               | $-0.25 \pm 0.02$  | $-0.21 \pm 0.02$  |
| $I_{\text{Corr}}$ ( $\mu\text{A}$ ) | $0.48 \pm 0.12$   | $0.09 \pm 0.004$  |
| Corrosion rate (mmpy)               | $0.005 \pm 0.001$ | $0.001 \pm 0.001$ |
| $E_{\text{break}}$ (v)              | $0.47 \pm 0.03$   | $0.13 \pm 0.04$   |

| Corrosion rate (mm/yr) |            |
|------------------------|------------|
| Outstanding            | < 0.02     |
| Excellent              | 0.02 – 0.1 |
| Good                   | 0.1 – 0.5  |
| Fair                   | 0.5 - 1    |
| Poor                   | 1 - 5      |
| Unacceptable           | > 5        |

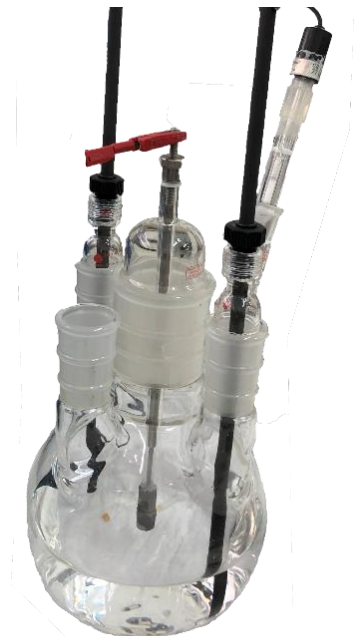



# Localized corrosion attack

**Printed  
316L**

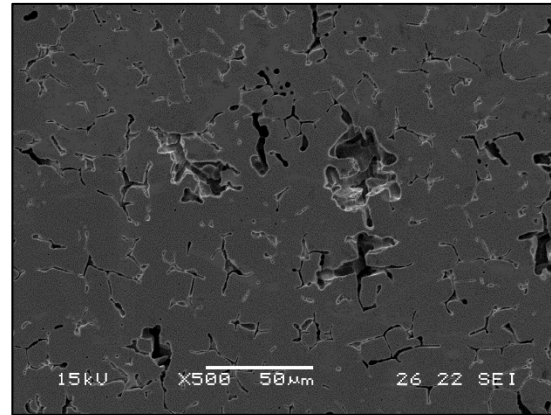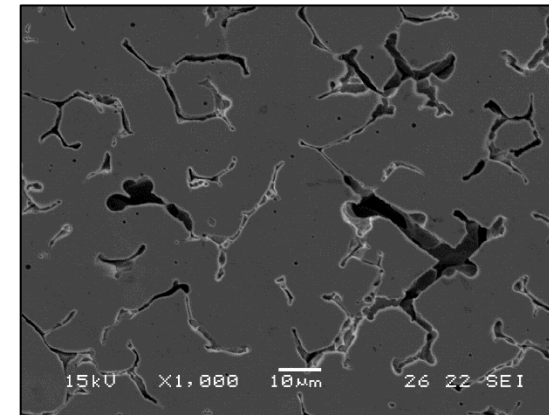

**Wrought  
316L**

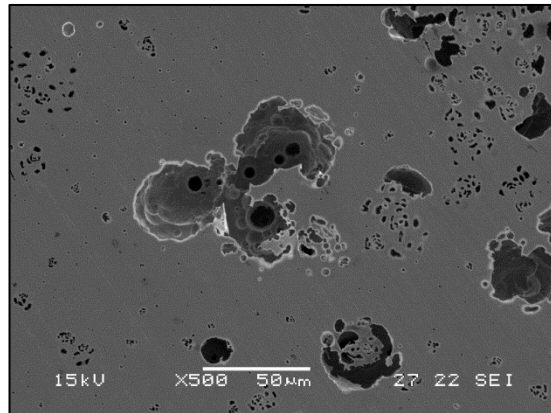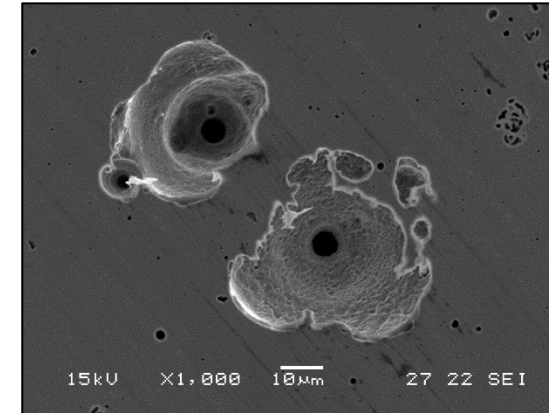

- As expected from active - passive polarization curve, both alloys presented pitting corrosion attack.
- While the pitting corrosion attack in the wrought alloy was relatively scattered, this attack was more intense in the printed alloy at the interface between the austenitic matrix and the ferritic phase.



# Impedance spectroscopy

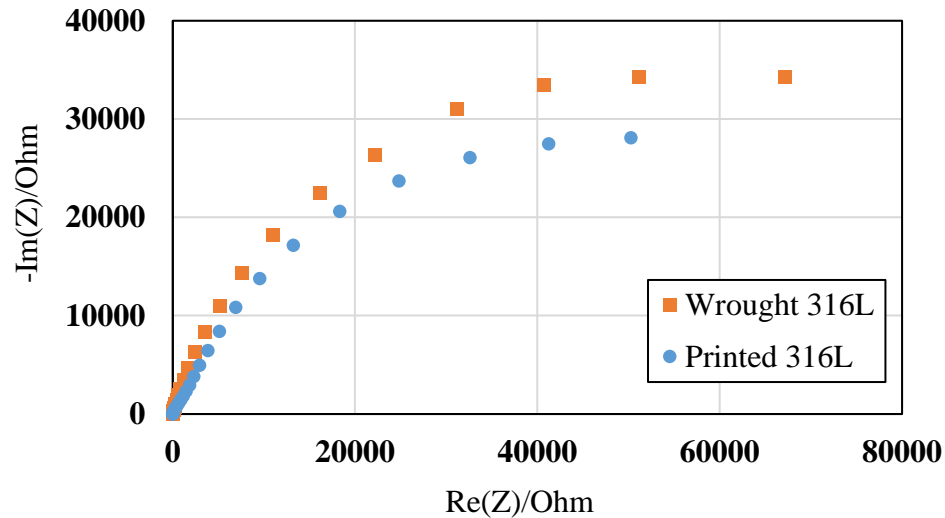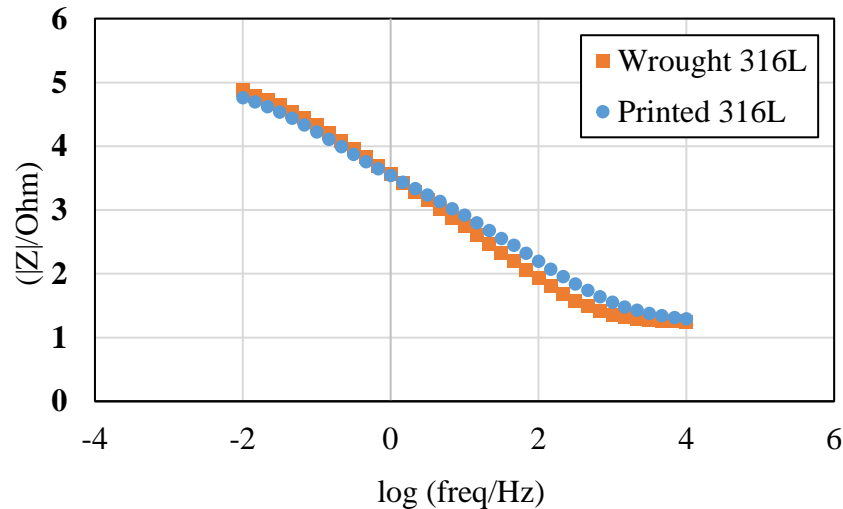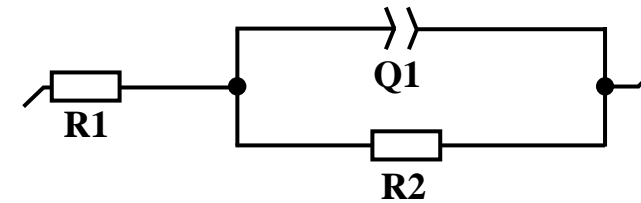

|                     | R1 (Ohm) | Q1<br>( $F.s^{(a-1)}$ ) | a     | R2<br>(Ohm) |
|---------------------|----------|-------------------------|-------|-------------|
| <b>Printed 316L</b> | 15.6     | 7.31E-5                 | 0.705 | 92,178      |
| <b>Wrought 316L</b> | 16.98    | 6.07E-5                 | 0.825 | 83,863      |

- The differences between the two alloys in terms of impedance examination were minor and in accord the results obtained by the potentiodynamic polarization analysis.



# Slow Strain Rate Tasting (SSRT)

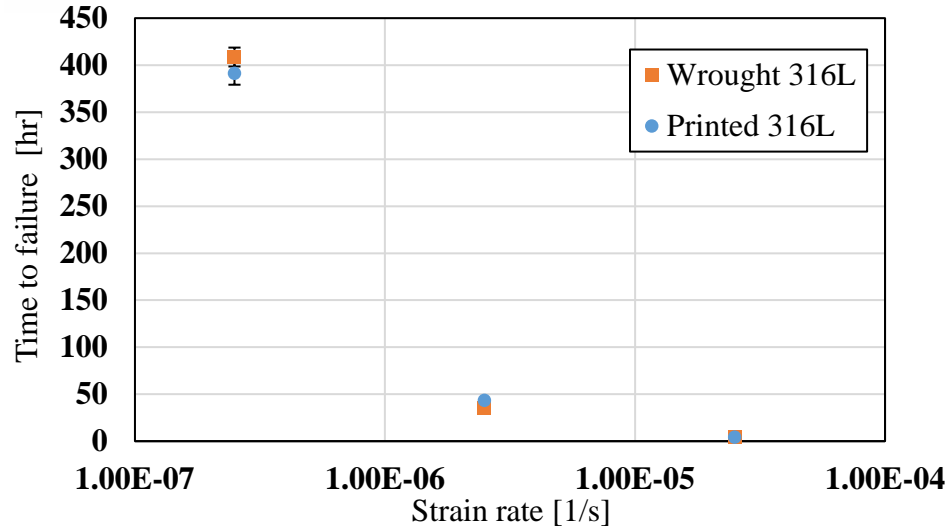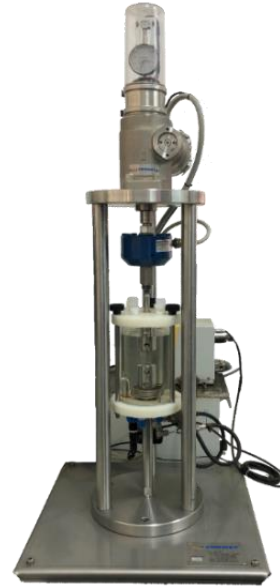

- The differences in UTS and elongation between the two alloys comes in line with their inherent differences in mechanical properties.
- The stain rate sensitively factors ( $m$ ) of the two alloys were very close. This indicated that their stress corrosion sensitivity was similar as demonstrated by nearly equal time to failure.

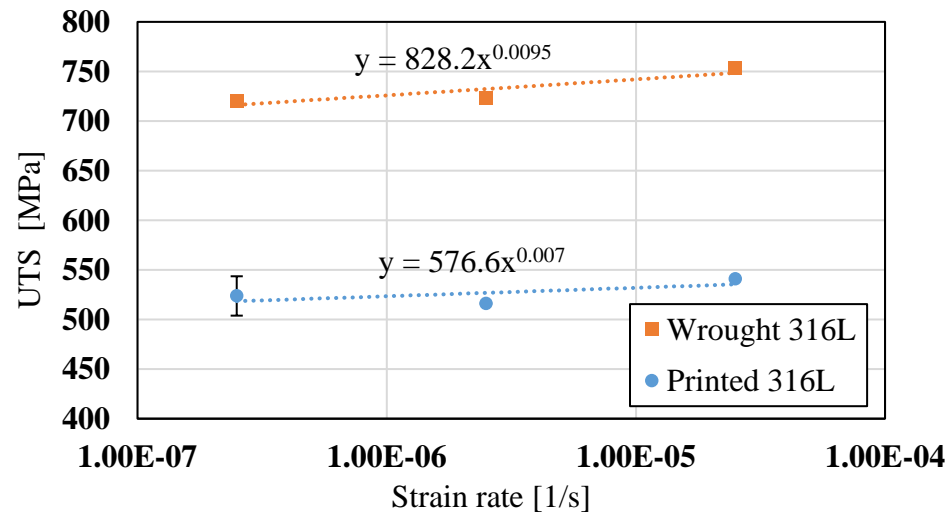

$$\sigma_{UTS} = C \cdot \dot{\epsilon}^m$$

$m$  - Strain rate sensitivity factor

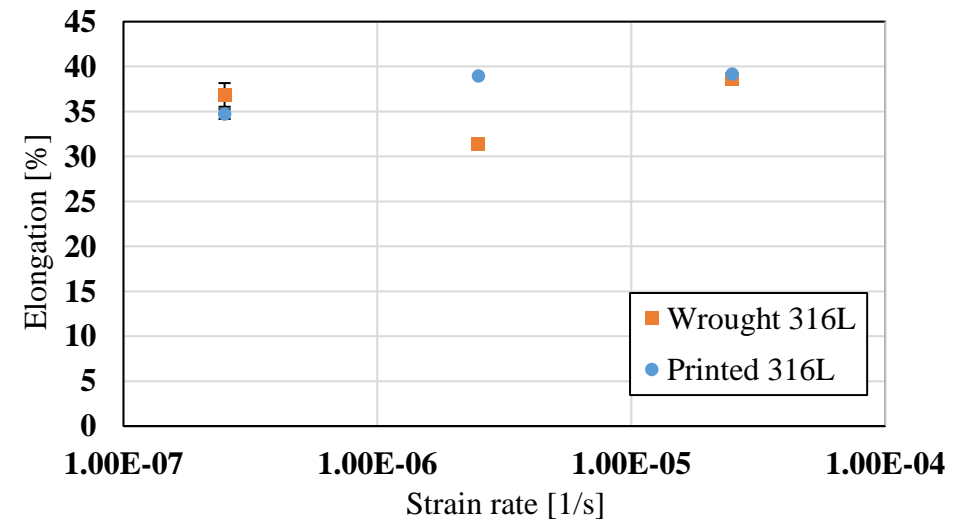

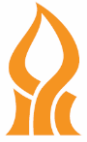

## Conclusions related to printed 316L alloy

1. The corrosion performance of the printed 316L obtained by a WAAM process was quite similar to its counterpart wrought alloy.

In both cases the corrosion resistance was excellent as expected from austenitic stainless steel.

2. The stress corrosion resistance of the printed 316L and wrought alloy in terms SSRT analysis were similar apart from their inherent differences in mechanical properties.

### **General conclusion**

The promising results of WAAM with ferrous alloys can pave the road for future WAAM applications using refractory metals such as Tantalum and Tungsten as raw material.

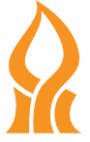

## Related Publications

---

1. **T. Ron**, O. Dolev, A. Leon, A. Shirizly and E. Aghion “Effect of Phase Transformation on Stress Corrosion Behavior of Additively Manufactured Austenitic Stainless Steel Produced by Directed Energy Deposition”. *Materials*, 2021 14(1), 55;
2. **T. Ron**, G. K Levy, O. Dolev, A. Leon, A. Shirizly and E. Aghion "The Effect of Microstructural Imperfections on Corrosion Fatigue of Additively Manufactured ER70S-6 Alloy Produced by Wire Arc Deposition" *Metals* Jan. 2020.
3. **T. Ron**, G. K Levy, O. Dolev, A. Leon, A. Shirizly and E. Aghion "Environmental behavior of low carbon steel produced by a wire arc additive manufacturing process" *Metals*, 2019, 9, 888.

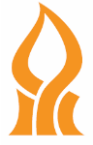

**Thank You for  
Your Attention!**
